# Supplementary material for: A rational design of carbon dots via the combination of nitrogen and oxygen functional groups towards the first NIR window absorption
Source: Royal Society of Chemistry journal article supplement (doi:10.1039/d1tc04951h), 2021-12-15
Supplement: d1tc04951h1.pdf [file d1tc04951h1.pdf]

**Electronic Supplementary Information (ESI)**

**A rational design of Carbon Dots via the combination of Nitrogen and  
Oxygen Functional Groups toward the first NIR window Absorption**

Reza Umami<sup>‡a</sup>, Fitri Aulia Permatasari<sup>‡a</sup>, Diva Addini Maghribi Muyassiroh<sup>a</sup>, Arum Sinda  
Santika<sup>a</sup>, Citra Deliana Dewi Sundari<sup>b,c</sup>, Atthar Luqman Ivansyah<sup>d,e</sup> Takashi Ogi<sup>f</sup> and Ferry  
Iskandar<sup>a,g\*</sup>

<sup>a</sup>Department of Physics, Faculty Mathematics and Natural Sciences, Institut Teknologi Bandung, Jalan Ganesha 10, Bandung, West Java 40132, Indonesia.

<sup>b</sup>Inorganic and Physical Chemistry Division, Faculty of Mathematics and Natural Sciences, Institut Teknologi Bandung, Jl. Ganesha 10, Bandung, West Java 40132, Indonesia.

<sup>c</sup>Department of Chemistry Education, UIN Sunan Gunung Djati Bandung, Jl. Cimincrang, Bandung, West Java 40292, Indonesia.

<sup>d</sup>Master Program in Computational Science, Faculty of Mathematics and Natural Sciences, Institut Teknologi Bandung, Jl. Ganesha 10, West Java, Bandung, 40132, Indonesia

<sup>e</sup>Department of Chemistry, Faculty of Mathematics and Natural Sciences, Institut Teknologi Bandung, Jl. Ganesha 10, West Java, Bandung, 40132, Indonesia

<sup>f</sup>Chemical Engineering Program, Department of Advanced Science and Engineering, Graduate School of Advanced Science and Engineering, Hiroshima University, 1-4-1 Kagamiyama, Higashihiroshima 739-8527, Japan

<sup>g</sup>Research Center for Nanoscience and Nanotechnology, Institut Teknologi Bandung, Jalan Ganesha 10, Bandung, West Java 40132, Indonesia.

\***Email:** ferry@fi.itb.ac.id

‡ Authors with equal contribution.

Table of Content

|                 |                                                                                                                                                                                                                                                                                                            |   |
|-----------------|------------------------------------------------------------------------------------------------------------------------------------------------------------------------------------------------------------------------------------------------------------------------------------------------------------|---|
| <b>Table S1</b> | Excitation energies, wavelengths, oscillator strengths, transition coefficients and percentage transition contribution of excited states in CDs with Nitrogen functionalization.....                                                                                                                       | 3 |
| <b>Table S2</b> | The percentage of pyridinic-N, pyrrolic-N and graphitic-N content in XPS N1s of the as-synthesized CDs.....                                                                                                                                                                                                | 3 |
| <b>Table S3</b> | The percentage of the presence of surface functional O atom bonds in the XPS O1s of the as-synthesized CDs.....                                                                                                                                                                                            | 3 |
| <b>Fig. S1</b>  | The absorbance spectra of CDs that was prepared by microwave assisted-hydrothermal for 4h at 140°C.....                                                                                                                                                                                                    | 4 |
| <b>Fig. S2</b>  | The Optimized structure and calculated absorption wavelength of PAH with different size as a CDs' model.....                                                                                                                                                                                               | 4 |
| <b>Fig. S3</b>  | Photoluminescence (PL) emission and excitation spectra of the as-synthesized CDs. The inset picture is digital photograph of the as-synthesized CDs under Visible light and 365 nm-UV irradiations.....                                                                                                    | 5 |
| <b>Fig. S4</b>  | AFM image of the as-synthesized CDs that exhibit a first NIR window. The inset image is the height profile of the CDs along AB axis. The CDs particle in spherical shape with the height of 3.45 nm.....                                                                                                   | 5 |
| <b>Fig. S5</b>  | The calculation of absorbance spectra on CDs doped configuration-N (pyridinic-N, pyrrolic-N and graphitic-N).....                                                                                                                                                                                          | 6 |
| <b>Fig. S6</b>  | Full Scan XPS of the as-synthesized Carbon Dots that prepared through a microwave assisted hydrothermal. The chemical composition was calculated based on the Full scan XPS with weighting RSF factor in CasaXPS.....                                                                                      | 6 |
| <b>Fig. S7</b>  | The bandgap energy levels on CDs doped configuration-N (pyridinic-N, pyrrolic-N and graphitic-N).....                                                                                                                                                                                                      | 7 |
| <b>Fig. S8</b>  | The calculation of absorbance spectra on CDs with variations in the number of amino.....                                                                                                                                                                                                                   | 7 |
| <b>Fig. S9</b>  | Transition Density Matrix of the CDs with various combination N and O surface functional groups. Each model was defined as seven fragments that represents the sp <sup>2</sup> carbon structure, N configurations (amino, N-pyridinic, N-pyrrolic and N-Graphitic) and O functional groups (carbonyl)..... | 8 |
| <b>Fig. S10</b> | (a) N1s XPS spectrum of the N-Graphitic CDs-C=O. (b) O1s XPS spectrum of the N-Graphitic-C=O. (c) Absorption spectrum of the N-Graphitic CDs-C=O. The inset picture is the digital image of the samples under visible light and 365 nm UV lamp irradiation.....                                            | 8 |

## Electronic Supplementary Information (ESI)

**Table S1.** Excitation energies, wavelengths, oscillator strengths, transition coefficients and percentage transition contribution of excited states in CDs with Nitrogen functionalization.

| Structure CDs   | Sn | $\lambda$ abs (nm) | Oscillat or strength (f) | Transition coefficients | Contrib ution (%) | Carbon |        | Nitrogen |        |
|-----------------|----|--------------------|--------------------------|-------------------------|-------------------|--------|--------|----------|--------|
|                 |    |                    |                          |                         |                   | Occ.   | Unocc. | Occ.     | Unocc. |
| Pristine CDs    | S3 | 441                | 1.303                    | H-1 $\rightarrow$ L+1   | 38.6%             | 1.00   | 1.00   | -        | -      |
|                 |    |                    |                          | H $\rightarrow$ L       | 38.4%             | 1.00   | 1.00   | -        | -      |
|                 |    |                    |                          | H $\rightarrow$ L+1     | 11.5%             | 1.00   | 1.00   | -        | -      |
|                 |    |                    |                          | H-1 $\rightarrow$ L     | 11.5%             | 1.00   | 1.00   | -        | -      |
| Amino CDs       | S1 | 585                | 0.087                    | H-1 $\rightarrow$ L     | 77.5%             | 0.91   | 1.00   | 0.09     | 0.00   |
|                 |    |                    |                          | H $\rightarrow$ L+1     | 22.5%             | 1.00   | 0.97   | 0.00     | 0.03   |
| N-pyrrolic CDs  | S2 | 525                | 0.101                    | H $\rightarrow$ L       | 74.7%             | 1.00   | 0.99   | 0.00     | 0.01   |
|                 |    |                    |                          | H-1 $\rightarrow$ L+1   | 25.3%             | 0.93   | 1.00   | 0.07     | 0.00   |
| N-pyridinic CDs | S3 | 446                | 1.147                    | H $\rightarrow$ L+1     | 52.3%             | 1.00   | 1.00   | 0.00     | 0.00   |
|                 |    |                    |                          | H-1 $\rightarrow$ L     | 44.7%             | 0.97   | 0.94   | 0.03     | 0.06   |
|                 |    |                    |                          | H-2 $\rightarrow$ L+2   | 3.0%              | 0.97   | 0.94   | 0.03     | 0.06   |
| N-graphitic CDs | S2 | 786                | 0.215                    | H $\rightarrow$ L+1     | 89.3%             | 1.00   | 0.93   | 0.00     | 0.07   |
|                 |    |                    |                          | H-1 $\rightarrow$ L     | 7.3%              | 1.00   | 0.90   | 0.00     | 0.10   |
|                 |    |                    |                          | H-2 $\rightarrow$ L+2   | 3.3%              | 1.00   | 1.00   | 0.00     | 0.00   |

**Table S2.** The percentage of N-pyridinic, N-pyrrolic, N-graphitic and amino content in XPS N1s of the as-synthesized CDs

| Sample              | N-pyridinic      | N-pyrrolic        | N-Graphitic       | Amino groups      |
|---------------------|------------------|-------------------|-------------------|-------------------|
| N-pyrrolic CDs-C=O  | (2.98 $\pm$ 3) % | (54.80 $\pm$ 3) % | (18.30 $\pm$ 3) % | (23.92 $\pm$ 3) % |
| N-graphitic CDs-C=O | (1.25 $\pm$ 3) % | (15.82 $\pm$ 3) % | (63.43 $\pm$ 3) % | (19.50 $\pm$ 3) % |

**Table S3.** The percentage of the presence of surface functional O atom bonds in the XPS O1s of the as-synthesized CDs

| Sample              | C=O               | C-O-C, C-O-OH     |
|---------------------|-------------------|-------------------|
| N-pyrrolic CDs-C=O  | (53.80 $\pm$ 3) % | (46.20 $\pm$ 3) % |
| N-graphitic CDs-C=O | (55.87 $\pm$ 3) % | (44.23 $\pm$ 3) % |

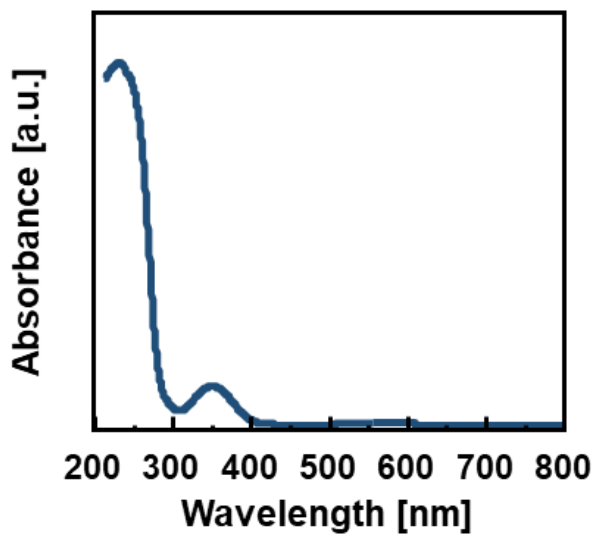

**Fig. S1.** The absorbance spectra of CDs that was prepared by microwave assisted-hydrothermal for 4h at 140°C.

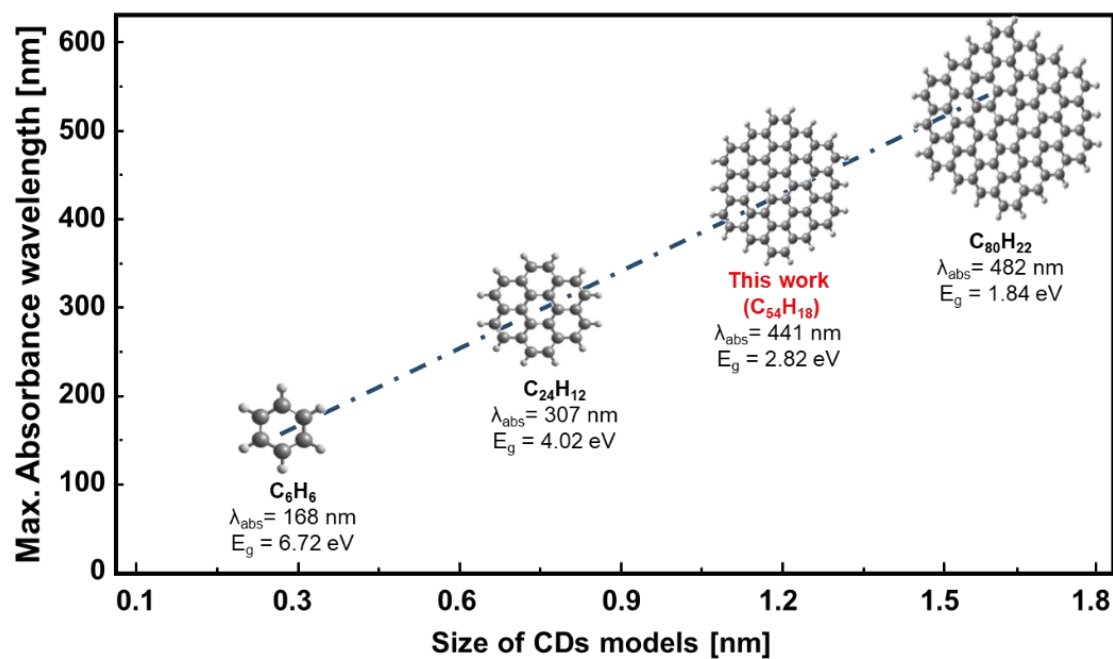

**Fig. S2** The Optimized structure and calculated absorption wavelength of PAH with different size as a CDs' model.

## Electronic Supplementary Information (ESI)

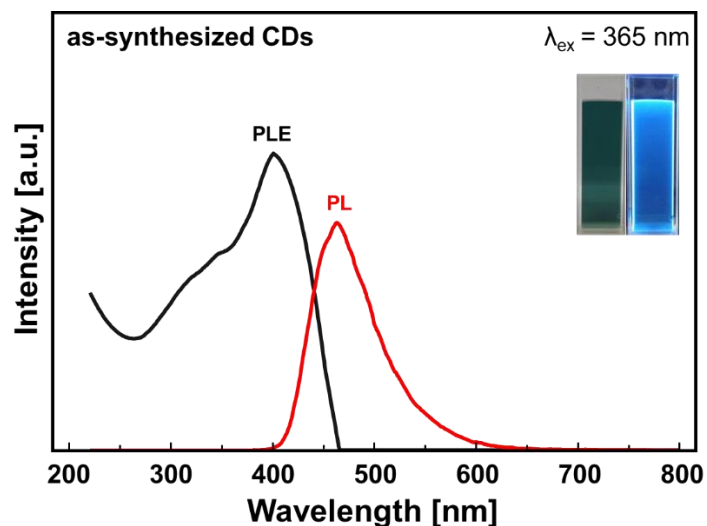

**Fig. S3** Photoluminescence (PL) emission and excitation spectra of the as-synthesized CDs. The inset picture is digital photograph of the as-synthesized CDs under Visible light and 365 nm-UV irradiations.

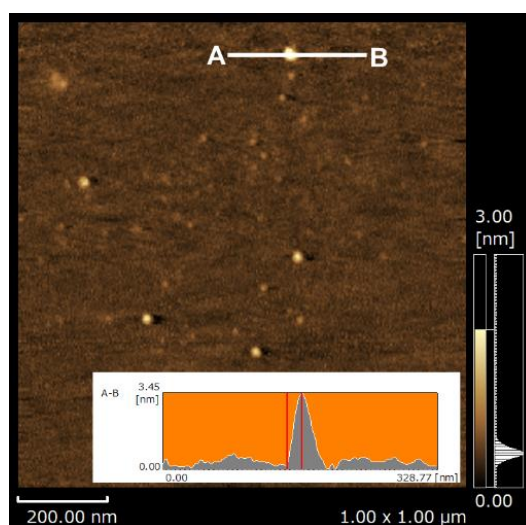

**Fig. S4** AFM image of the as-synthesized CDs that exhibit a first NIR window. The inset image is the height profile of the CDs along AB axis. The CDs particle in spherical shape with the height of 3.45 nm.

## Electronic Supplementary Information (ESI)

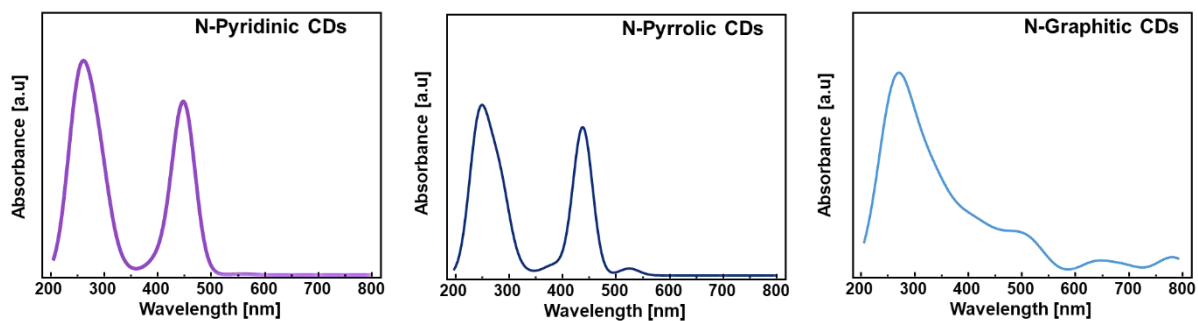

**Fig. S5.** The calculation of absorbance spectra on CDs doped configuration-N (pyridinic-N, pyrrolic-N and graphitic-N).

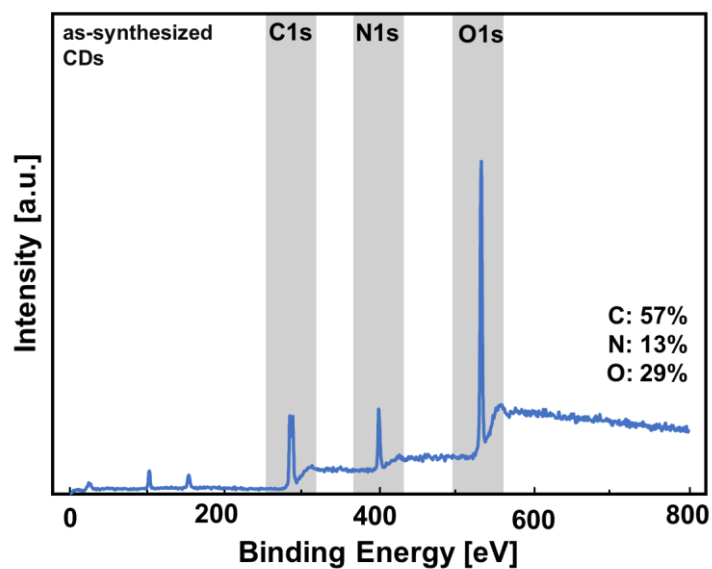

**Fig. S6** Full Scan XPS of the as-synthesized Carbon Dots that prepared through a microwave assisted hydrothermal. The chemical composition was calculated based on the Full scan XPS with weighting RSF factor in CasaXPS.

## Electronic Supplementary Information (ESI)

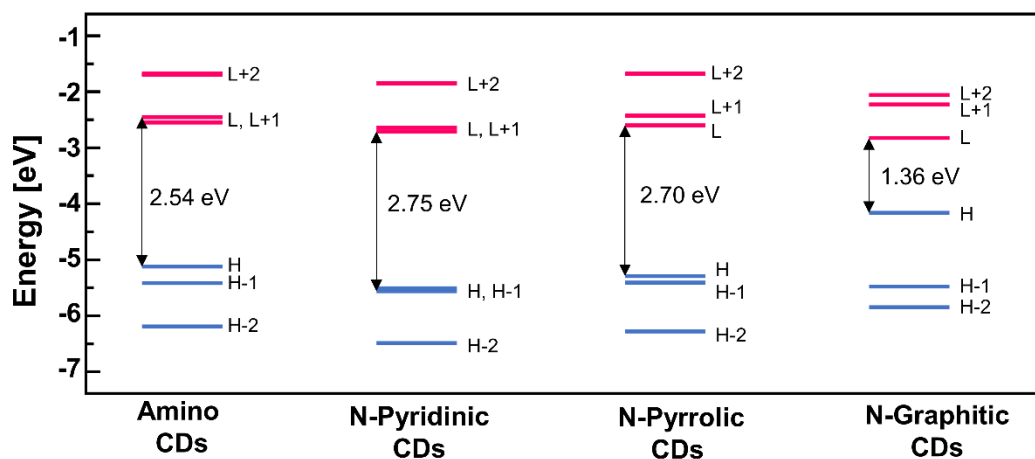

**Fig. S7** The bandgap energy levels on CDs doped configuration-N (pyridinic-N, pyrrolic-N and graphitic-N).

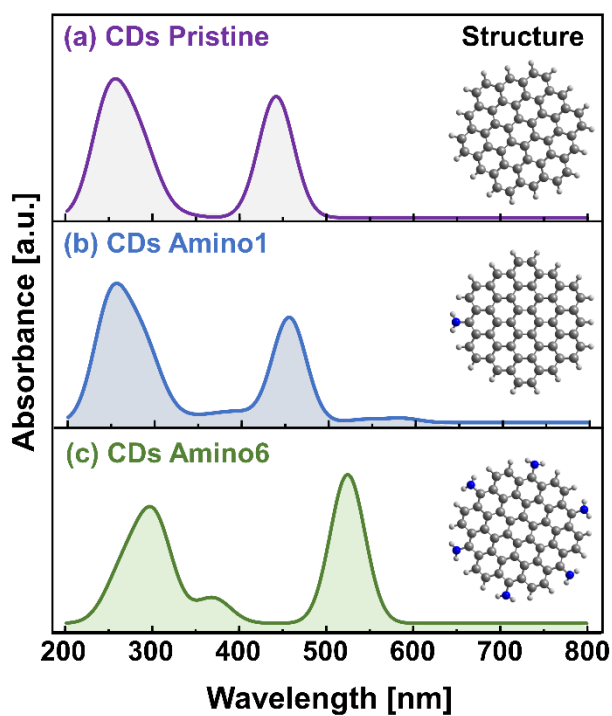

**Fig. S8** The calculation of absorbance spectra on CDs with variations in the number of amino.

## Electronic Supplementary Information (ESI)

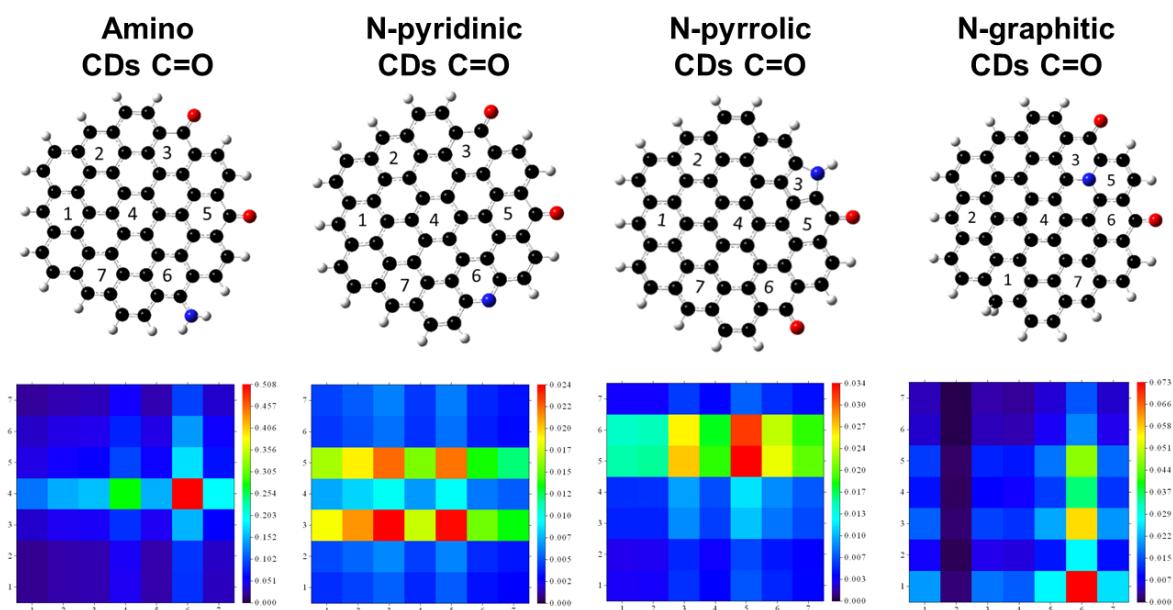

**Fig. S9** Transition Density Matrix of the CDs with various combination N and O surface functional groups. Each model was defined as seven fragments that represents the  $sp^2$  carbon structure, N configurations (amino, N-pyridinic, N-pyrrolic and N-Graphitic) and O functional groups (carbonyl).

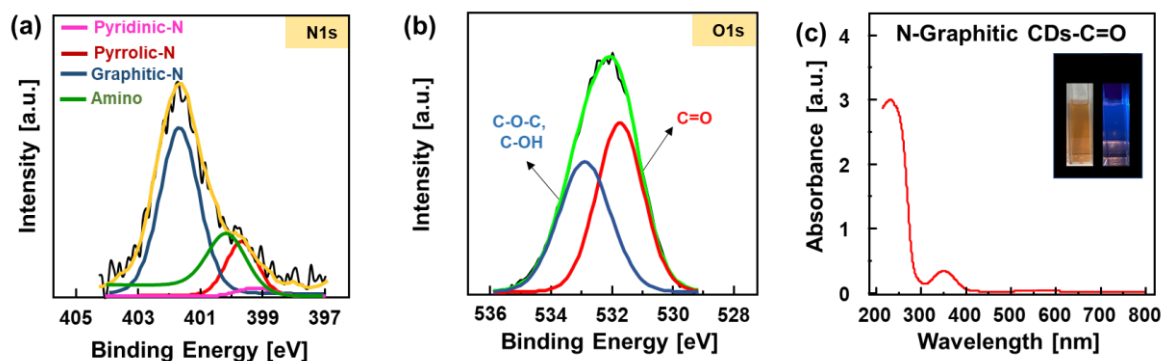

**Fig. S10** (a) N1s XPS spectrum of the N-Graphitic CDs-C=O. (b) O1s XPS spectrum of the N-Graphitic-C=O. (c) Absorption spectrum of the N-Graphitic CDs-C=O. The inset picture is the digital image of the samples under visible light and 365 nm UV lamp irradiation.
